# Supplementary material
Source: Springer Nature journal article supplement (https://www.springermedizin.de/resource/supplementary/12884_2011_473_MOESM6_ESM.pdf/9457766)
Supplement: MOESM6 [file 9457766]

**TABLE 5: RESULT OF TEST FOR MULTICOLLINEARITY IN MODEL FOR INFANT MORTALITY**

| <i>Variable</i> | <i>VIF</i> | <i>VIF</i> | <i>Tolerance</i> | <i>Squared</i> |
|-----------------|------------|------------|------------------|----------------|
| mat_educ        | 1.91       | 1.38       | 0.5232           | 0.4768         |
| mat_age         | 2.12       | 1.46       | 0.4716           | 0.5284         |
| birth_ord       | 4.72       | 2.17       | 0.2117           | 0.7883         |
| age_marriage    | 1.55       | 1.25       | 0.6445           | 0.3555         |
| mat_status      | 1.01       | 1.00       | 0.9944           | 0.0056         |
| contracept      | 1.16       | 1.08       | 0.8647           | 0.1353         |
| mat_para        | 4.65       | 2.16       | 0.2149           | 0.7851         |
| breast_fed      | 1.06       | 1.03       | 0.9395           | 0.0605         |
| water_src       | 1.25       | 1.12       | 0.7972           | 0.2028         |
| prec_intv       | 1.05       | 1.03       | 0.9512           | 0.0488         |
| zhser4          | 1.79       | 1.34       | 0.5598           | 0.4402         |
| cok_fuel        | 1.76       | 1.33       | 0.5671           | 0.4329         |
| fam_size        | 1.24       | 1.11       | 0.8071           | 0.1929         |
| tiolet_fact     | 1.58       | 1.26       | 0.6338           | 0.3662         |
| wealth_indx     | 1.73       | 1.31       | 0.5785           | 0.4215         |
| reg_ion         | 1.27       | 1.13       | 0.7871           | 0.2129         |
| birth_wt        | 1.01       | 1.01       | 0.9892           | 0.0108         |
| residence       | 1.44       | 1.20       | 0.6940           | 0.3060         |
| pat_occpt       | 1.02       | 1.01       | 0.9764           | 0.0236         |
| sex_1           | 1.00       | 1.00       | 0.9990           | 0.0010         |

**MEAN VIF = 1.72**
